# Supplementary material for: Self-lubricating organogels (SLUGs) with exceptional syneresis-induced anti-sticking properties against viscous emulsions and ices
Source: Royal Society of Chemistry journal article supplement (doi:10.1039/c5ta02690c), 2015-01-01
Supplement: c5ta02690c7.pdf [file c5ta02690c7.pdf]

## Supporting Information

**Title: Self-Lubricating Organogels (SLUGs) with Exceptional Syneresis-induced Anti-sticking Properties Against Viscous Emulsions and Ices**

*Chihiro Urata, Gary J. Dunderdale, Matt W. England, and Atsushi Hozumi\**

## 1 Experimental

### 2 Materials

3 Sylgard® 184 silicone elastomer kit was purchased from Dow Corning Toray Co. Ltd.  
4 Toluene, *n*-hexane, *n*-octane, 2,2,4,4,6,8,8-heptamethylnonane (isocetane), *n*-docecane, *n*-  
5 tetradecane, and *n*-hexadecane, were purchased from Wako Pure Chemical Industries Ltd. *n*-  
6 Octadecyltrichlorosilane was purchased from Tokyo Chemical Industry Co, Ltd.  
7 Polydimethylsiloxane (silicone oil), polymethylphenylsiloxane (AR20),  
8 polymethylphenylsiloxane (CR100), Phenylmethylsiloxane-dimethylsiloxane copolymer  
9 (AS100), and phenylmethylsiloxane-dimethylsiloxane copolymer (AP100) were purchased  
10 from Sigma-Aldrich Co. Polymethylphenylsiloxane (TSF431) and polymethylphenylsiloxane  
11 (TSF437) were purchased from Momentive Co. All chemicals were used as received without  
12 further purification.

### 15 Preparation of PDMS-resin and organogels

16 PDMS-resin and various types of organogel were prepared by the following procedure (see  
17 Table S2 for the composition). First, 1 g of Sylgard 184 Base was mixed with *a* mL of an  
18 organic liquid phase1, *b* g of an organic liquid phase2, and 0.1 mL of Sylgard 184 curing  
19 agent; the solution was then vigorously mixed to obtain a homogeneous solution. The  
20 transparent solution was heated at 100 °C for 3 h in a Teflon® container/tray (perfluoroalkoxy  
21 copolymer resin, PFA), glass vial, or petridish to promote gelation. For the preparation of  
22 large samples, the compositions in the Table S2 were scaled up.

### 25 Swelling measurements

26 Swelling ratio of PDMS-resin for various liquids were obtained by comparing the  
27 original volume and estimated swollen volume, after being immersed in a solvent. We chose  
28 *n*-hexane as an extraction solvent because it shows high affinity for PDMS precursors and the  
29 resulting matrices, as well as has high volatility. First, pieces of PDMS-resin prepared from  
30 Sylgard 184 kit (about 10 mm × 6 mm × 1.5 mm), were washed by Soxhlet extractor for 48  
31 hours using *n*-hexane to remove unreacted silicones from the PDMS-resin. The pieces were  
32 then dried in an oven for 48 hours at 100 °C to remove the *n*-hexane completely. Each piece  
33 was then immersed in 3 mL of organic liquid(s) and shaken at 100 rpm for 4 days. After the  
34 swelling procedure, the pieces were wiped to remove any residual liquid and weighed. This  
35 weight was then converted to a volume by multiplying with the density of the each swelling  
36 liquid. The swelling ratio was calculated using the following formula. Measurements were  
37 performed at least 3 times for each sample.

38  
39 **Swelling ratio (S, %) =  $(V/V_0) \times 100$**

40  $V_0$ : initial volume of PDMS-resin

41  $V$ :  $V_0$  + uptaken volume of organic liquid

### 43 Syneresis behavior measurements

44 Syneresis behavior of organogels was investigated by monitoring their mass over time.  
45 Before weighing, gels were wiped dry of liquid using adsorbent tissue paper. The weight loss  
46 of the organogels was calculated as following formula. Measurements were performed at least  
47 3 times for each sample.

48  
49 **Weight loss (%) =  $((100 - W_t)/W_0) \times 100$**

50  $W_t$  = Weight of the organogels after the wipe dry

51  $W_0$  = Initial weight of the organogel

## Observation of droplet shape on the syneresis organogels surface

Static contact angles and shapes of water droplets were observed using a CA goniometer (Kyowa Interface Science, model CA-V150). A 5  $\mu$ L water drop was dispensed onto the organogels, and observed at various times. All measurements were performed at least 5 times for each sample.

## Measurement of water droplet velocity on inclined surfaces

Water droplet and various emulsions (50  $\mu$ L) were set on a sheet of organogel (100 mm  $\times$  100 mm) inclined at 30°. The average velocity was estimated using the total time to cross 100 mm of the sheet. Measurements were performed at least 5 times for each sample.

## Adhesion force measurement of solidified emulsions

Several emulsions were interposed between samples and a sponge equipped with a hook (30 mm  $\times$  30 mm) then the dried for 48 hours at 50 °C. After the emulsion had solidified, the hook was pulled up using a texture analyzer (CT3-4500, Brook field) in order to obtain the adhesion strength. Measurements were performed at least 5 times for each sample.

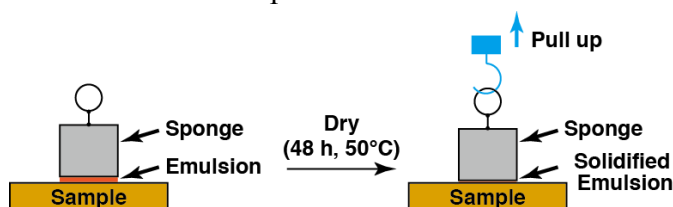

## Thermo-responsive syneresis behavior of the organogels

Organogels coated on petridishes ( $\phi$ : 90 mm) were cooled to -15 °C for 6 hours. After the incubation, the petridishes were warmed back to room temperature (r.t.). Measurements were performed at least 5 times for each sample.

## Ice adhesion test

Ice adhesion test was performed by a simple and conventional method demonstrated by many researchers (references #4 l)-n) and #10). Water (15 mL) was added to a polypropylene tube ( $\phi$ : 24 mm, h: 55 mm) on the samples coated on the petridish and water was frozen at -15 °C in the freezer for 6 hours. The test sets were transferred to the home-made ice adhesion strength-tester, which was equipped with a peltier cooling stage. The ice adhesion strength was measured by pushing the ice pillar with a stainless pole with a load cell. Measurements were performed at least 15 times for each sample.

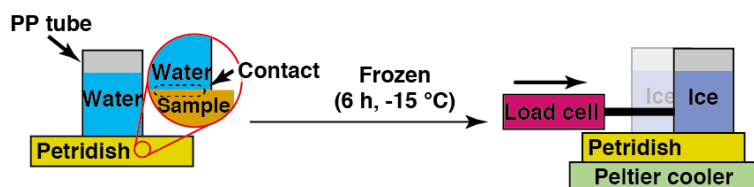

## Ice sliding test

Water (50 mL) was added into a polypropylene tube ( $\phi$ : 32 mm, h: 80 mm) on the organogel-coated petridishes set on a rotating stage. Water was frozen by cooling it to  $-15^{\circ}\text{C}$  in the freezer for 6 hours and test sets were then inclined to  $20^{\circ}$ .

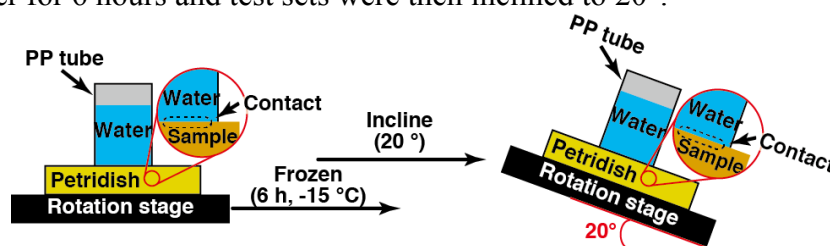

**Table S1.** Physico-chemical properties of the organic liquids used in this study.

| Liquid name                                              | MW (g/mol) | Viscosity (mPa·s) | Density (g/cm <sup>3</sup> ) | Boiling point (°C) | Melting point (°C) | Surface tension (dyn/cm) | Miscibility for PDMS precursor | Swelling ratio (S, %) | Standard deviation (-) | Class |
|----------------------------------------------------------|------------|-------------------|------------------------------|--------------------|--------------------|--------------------------|--------------------------------|-----------------------|------------------------|-------|
| <i>n</i> -Hexane                                         | 86.17      | 0.32              | 0.66                         | 69                 | -95                | 18.5                     | YES                            | 2.45                  | 0.0072                 | I     |
| <i>n</i> -Octane                                         | 114.23     | 0.508             | 0.702                        | 126                | -57                | 21.82                    |                                | 2.31                  | 0.0404                 |       |
| Toluene                                                  | 92.14      | 0.55              | 0.866                        | 111                | -95                | 28.4                     |                                | 2.24                  | 0.0086                 |       |
| <i>n</i> -Decane                                         | 142.28     | 0.86              | 0.731                        | 174                | -30                | 23.6                     |                                | 2.12                  | 0.0057                 |       |
| Isocetane                                                | 226.44     | 3.299             | 0.784                        | 247                | 102                | 24.32                    |                                | 1.96                  | 0.0079                 |       |
| <i>n</i> -Dodecane                                       | 170.33     | 1.3791            | 0.746                        | 216                | -12                | 23.35                    |                                | 1.94                  | 0.0080                 |       |
| Polydimethylsiloxane (silicone oil)                      | 770        | 5                 | 0.913                        | N/D                | -55                | 19.7                     |                                | 1.93                  | 0.0135                 |       |
| <i>n</i> -Tetradecane                                    | 198.39     | 2.0883            | 0.763                        | 253                | 6                  | 26.56                    |                                | 1.73                  | 0.0075                 |       |
| Polymethylphenylsiloxane (AR 20)                         | 350-450    | 20                | 1.01                         | N/D                | N/D                | N/D                      |                                | 1.68                  | 0.0099                 |       |
| <i>n</i> -Hexadecane                                     | 226.44     | 3.08              | 0.775                        | N/D                | 16-19              | 27.4                     |                                | 1.52                  | 0.0072                 |       |
| Polymethylphenylsiloxane (CR 100)                        | N/D        | 100               | 1.07                         | > 250              | < -60              | N/D                      | No                             | 1.41                  | 0.0892                 | II    |
| Phenylmethylsiloxane-dimethylsiloxane copolymer (AS 100) | N/D        | 100               | 0.995                        | N/D                | < -60              | N/D                      |                                | 1.37                  | 0.0032                 |       |
| Polymethylphenylsiloxane (TSF 431)                       | N/D        | 100               | 0.99                         | > 250              | < -70              | 21.3                     |                                | 1.33                  | 0.0126                 |       |
| Polymethylphenylsiloxane (TSF 437)                       | N/D        | 22                | 1.02                         | N/D                | N/D                | N/D                      |                                | 1.50                  | 0.0948                 | III   |
| Octadecyltrichlorosilane                                 | 247.67     | N/D               | 1.07                         | 229                | 23                 | N/D                      | No                             | 1.14                  | 0.0235                 |       |
| Phenylmethylsiloxane-dimethylsiloxane copolymer (AP 100) | 2000-2100  | 100               | 1.06                         | >350               | < -30              | 24.5                     |                                | 1.10                  | 0.0080                 |       |
| Water                                                    | 18.02      | 0.8               | 1                            | N/D                | 0                  | 72.8                     |                                | 1.00                  | 0.0023                 |       |

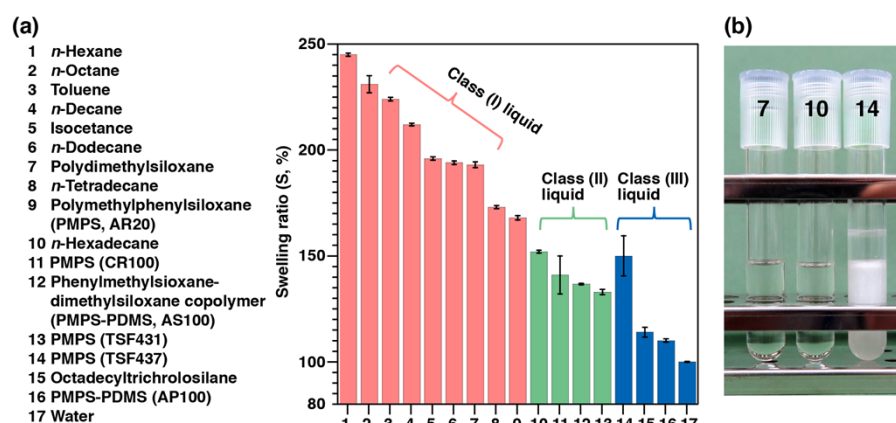

**Fig. S1.** Compatibility of PDMS-resin toward various organic liquids phases. (a) Swelling ratio of PDMS-resin toward several types of organic liquids and water. (b) Typical appearance of precursor solutions after mixing PDMS-precursor with polydimethylsiloxane (7, class (I) liquid), *n*-hexadecane (10, class (II) liquid), and TSF437 (14, class (III) liquid).

**Table S2.** Compositions of the precursor solution applied in this study.

| Sylgard  |                   | Liquid 1       |         | Liquid 2       |         | Volume percentage of organic liquid    |
|----------|-------------------|----------------|---------|----------------|---------|----------------------------------------|
| Base (g) | Curing agent (mL) | Type of liquid | a, mL   | Type of liquid | b, mL   | $\alpha$ , %                           |
| 1        | 0.1               | 1-13           | 0.5-30  | -              | -       | 50, 100, 150, 300, 600, 1200, and 3000 |
| 1        | 0.1               | 8              | 0.3-2.7 | 10             | 0.3-2.7 | 300                                    |
| 1        | 0.1               | 5              | 2.25    | 15             | 0.75    | 300                                    |
| 1        | 0.1               | 9              | 0.3-2.7 | 14             | 0.3-2.7 | 300                                    |

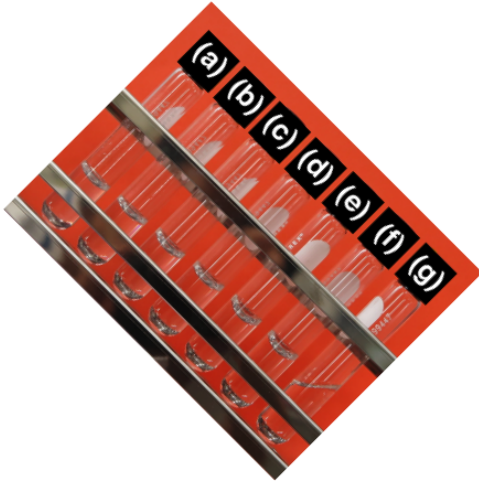

**Fig. S2.** Typical appearance of organogels (organic liquid: *n*-decane,  $\alpha$ : a=50, b=100, c=150, d=300, e=600, f=1200, g=3000). The samples were tilted at 45° to emphasis on the sol state of g=3000.

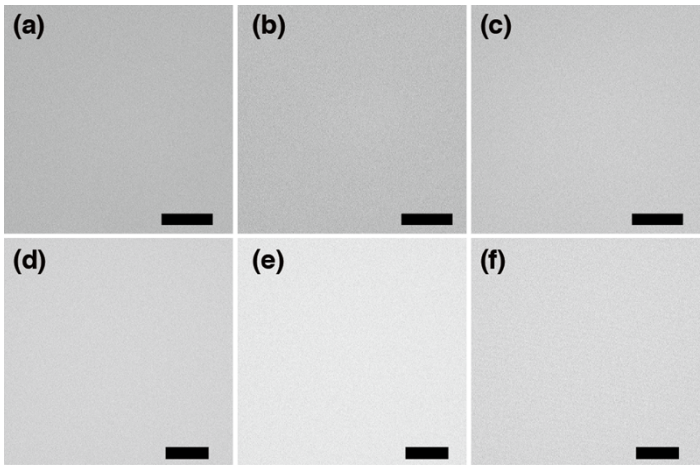

**Fig. S3.** SEM images of (a,d) PDMS-resin, (b,e) non-syneresis organogel (AR20,  $\alpha$ =300%), and (c,f) syneresis organogels (TSF431,  $\alpha$ =300%). Scale bar in the upper images are 30  $\mu$ m and lower images are 5  $\mu$ m. The organic phase in the sample (b,e) and (c,f) were extracted with *n*-hexane before the SEM observation.

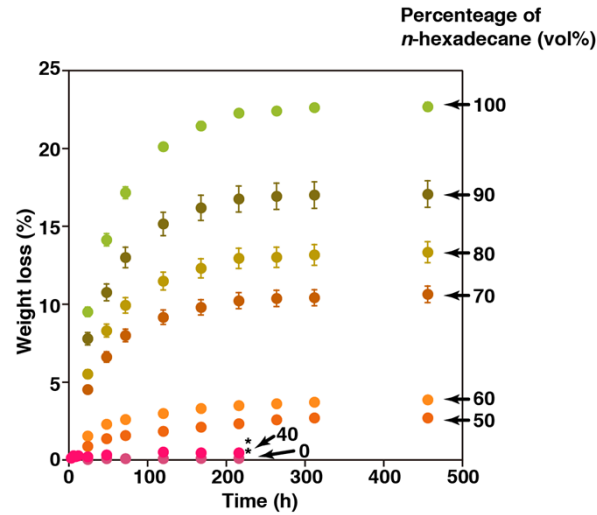

**Fig. S4.** Syneresis rates of organogels prepared with mixed organic phases (different volume percentage of *n*-hexadecane to *n*-tetradecane, \* indicates end of the measurements).

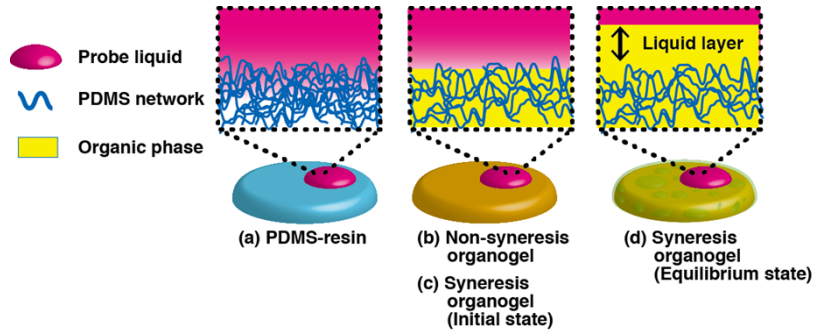

**Fig. S5.** Interfacial images of the samples (a: PDMS-resin, b: non-syneresis organogel, c: syneresis organogel in the initial state and d: syneresis organogel in the equilibrium state).

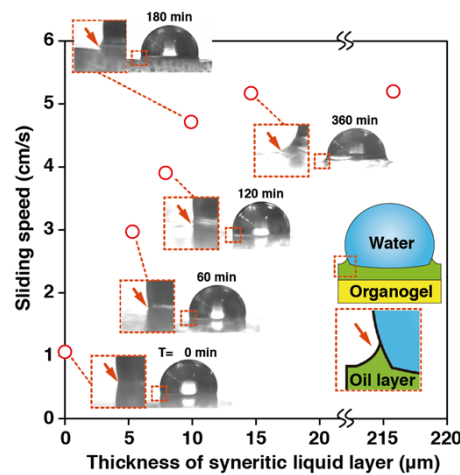

**Fig. S6.** Changes in dynamic dewetting behavior of water drops on the syneresis organogel (prepared with TSF431 as an organic phase) as a function of thickness of syneresis liquid layer. Inset images: time lapse images of a water droplet on the syneresis organogel (number on each water drop image indicates the elapsed time (min) after syneresis) and schematic image of the “wetting ridge”.

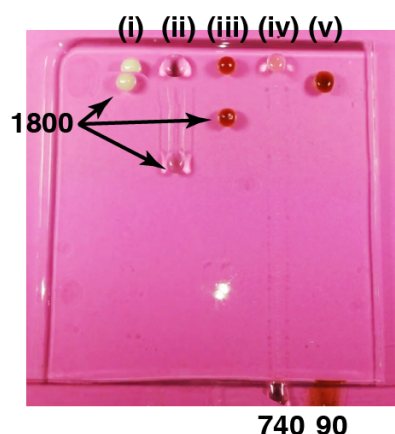

**Fig. S7.** Time lapse image of the flowing of emulsions (i: mayonnaise, ii: liquid glue, iii: ketchup, iv: honey, v: worcester source) on the non-syneresis organogel (prepared with AR20 as an organic phase) surface inclined at 30°. (Numbers in the image indicate the position of the emulsions at the time (sec). 2 images were overlaid to create the composite image displayed.)

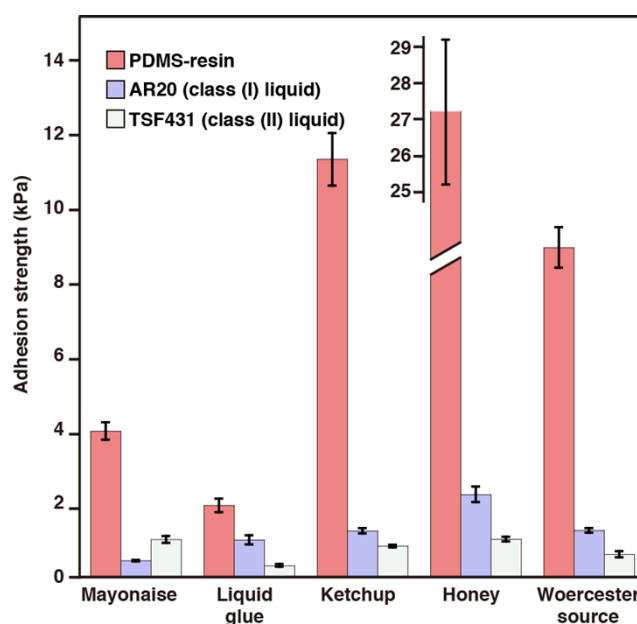

**Fig. S8.** Adhesion strength of the solidified emulsions on the PDMS-resin, and organogels prepared with AR20 (class (I) liquid) and TSF431 (class (II) liquid).



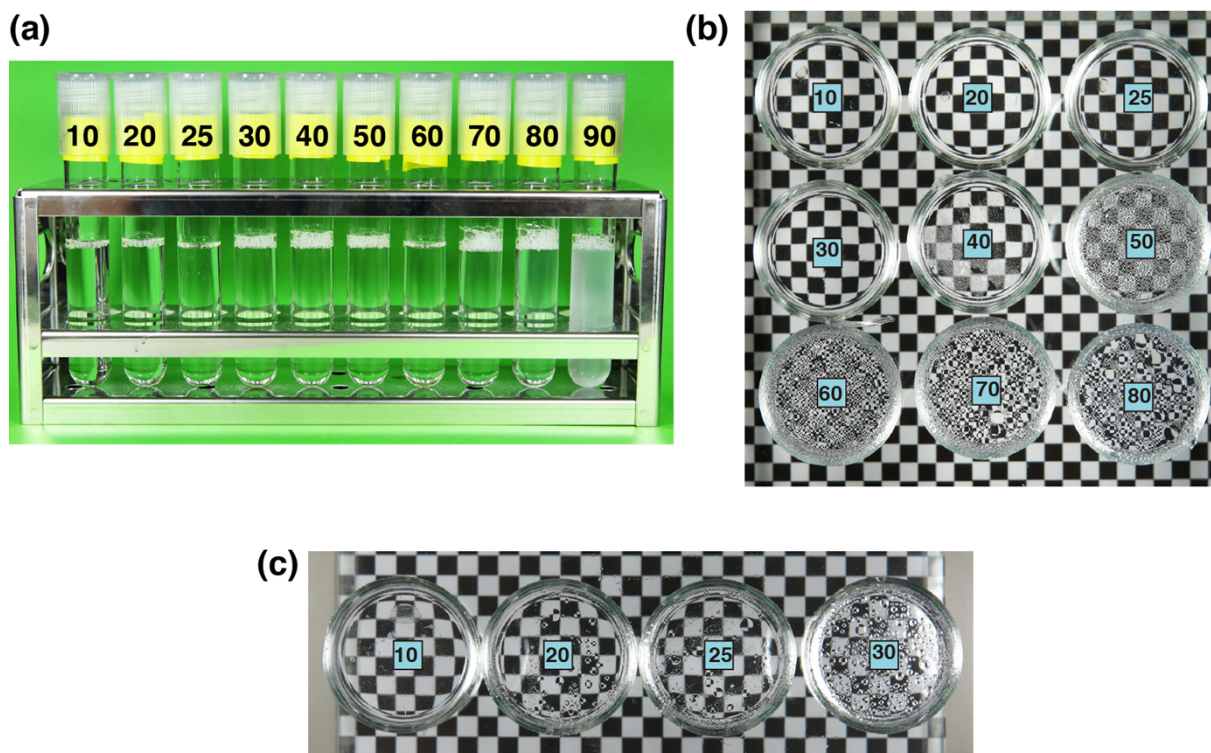

**Fig. S9.** (a) Appearance of precursor solution prepared with mixtures of AR20 (class (I) liquid) and TSF437 (class (III) liquid) as organic phases in various proportions. (b) Syneresis behavior of organogels at r.t. (c) Syneresis behavior of organogels after incubation for 6 hours at -15 °C. Number on the vials and organogels indicate the volume percentage of TSF437.



- 1 **Movie S1.** Time-lapse movie of syneresis behavior of organogels prepared with AR20 (class  
2 (I) liquid) and TSF431 (class (II) liquid) (Replay speed:  $\times 900$ ).
- 3 **Movie S2.** Time-lapse movie of differences in slippery properties of emulsions (Replay  
4 speed:  $\times 10$ ) on the organogel prepared with TSF431 (class (II) liquid).
- 5 **Movie S3.** Time-lapse movie of differences in slippery properties of emulsions (Replay  
6 speed:  $\times 120$ ) on the organogel prepared with AR20 (class (I) liquid).
- 7 **Movie S4.** Time-lapse movie of the formation of superhydrophobic organogels surfaces  
8 prepared with isocetane (class (I) liquid) and *n*-octadecyltrichlorosilane (class (III) liquid)  
9 (Replay speed:  $\times 370$ ).
- 10 **Movie S5.** Behavior of water droplets on the superhydrophobic organogel surface shown in  
11 Movie S4 (Replay speed:  $\times 1$ ).
- 12 **Movie S6.** Spontaneous motion of an ice pillar formed on an organogel prepared with a  
13 mixture of AR20 (class (I) liquid) and TSF431 (class (II) liquid) (Replay speed:  $\times 300$ ).
- 14
